# Supplementary material for: The nanoencapsulation of curcuminoids extracted fromCurcuma longaL. and an evaluation of their cytotoxic, enzymatic, antioxidant and anti-inflammatory activities
Source: Royal Society of Chemistry journal article supplement (doi:10.1039/c8fo02431f), 2019-01-01
Supplement: c8fo02431f1.pdf [file c8fo02431f1.pdf]

### SUPPLEMENTARY MATERIAL

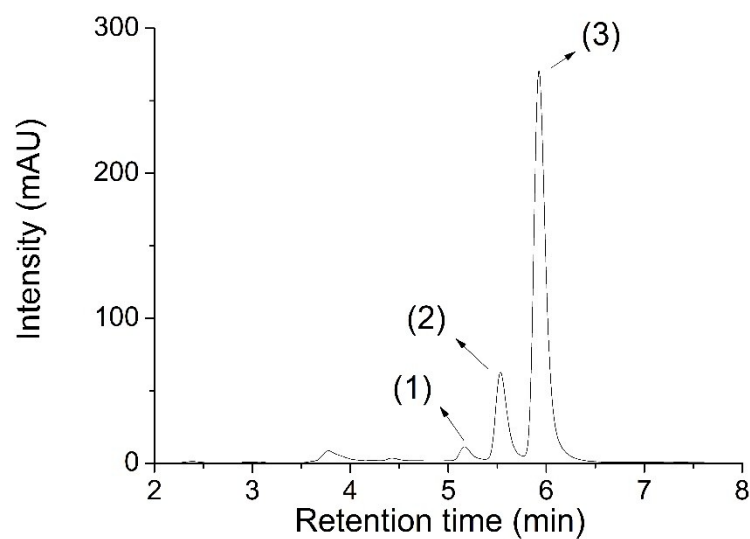

**Figure S1.** Chromatogram of commercial curcumin (1 - bisdemethoxycurcumin, 2 – demethoxycurcumin and 3 – curcumin).
